# Supplementary material
Source: PubMed Central journal article supplement (PMC2871478)
Supplement: supp_M109.072694_jbc.M109.072694-1.pdf [file supp_M109.072694_jbc.M109.072694-1.pdf]

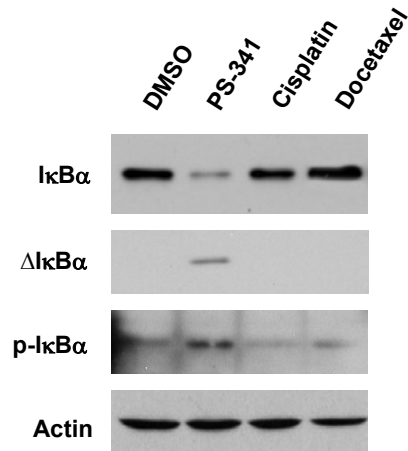

**Fig. S1. Effects of PS-341, cisplatin and docetaxel on IκBα phosphorylation and degradation.** H157 cells were treated with 50 nM PS-341, 5 uM cisplatin and 50 nM docetaxel for 8 h and then harvested for preparation of whole cell protein lysates and subsequent Western blot analysis. ΔIκBα, cleaved IκBα.

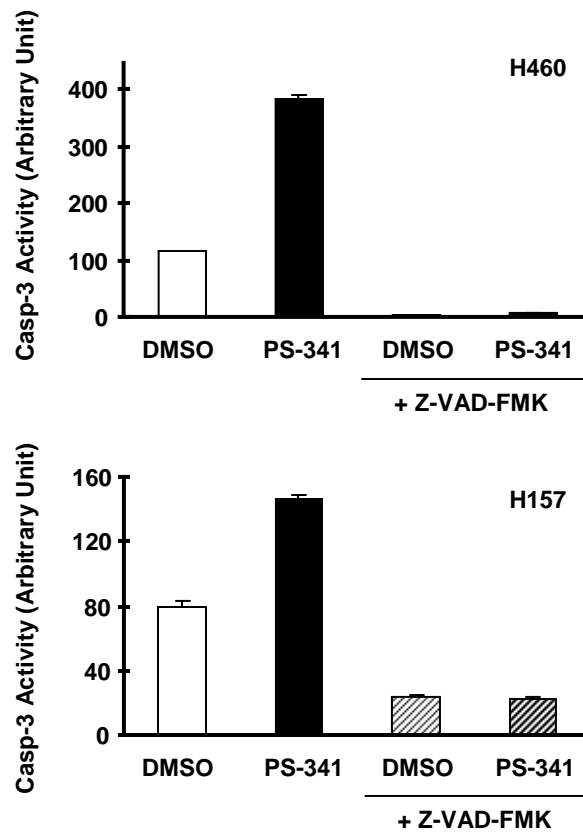

**Fig. S2. Z-VAD-FMK blocks PS-341-induced increase in caspase-3 activity.** The indicated cell lines were incubated with 50 nM PS-341 in the absence and presence of 50  $\mu$ M Z-VAD-FMK for 24 h and then subjected to caspase-3 activity assay. Columns, means of four replicate determinations; Bars,  $\pm$  SD.

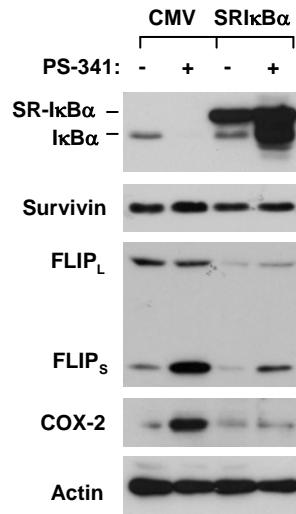

**Fig. S3. PS-341 increases survivin, c-FLIP and COX-2 through a NF- $\kappa$ B-dependent mechanism.** H157 cells were infected with 50 MOI Ad-CMV or Ad-SR $\kappa$ B $\alpha$  for 48 h. The cells were treated with DMSO or 50 nM PS-341 for additional 8 h and then harvested for preparation of whole cell protein lysates and subsequent Western blot analysis.

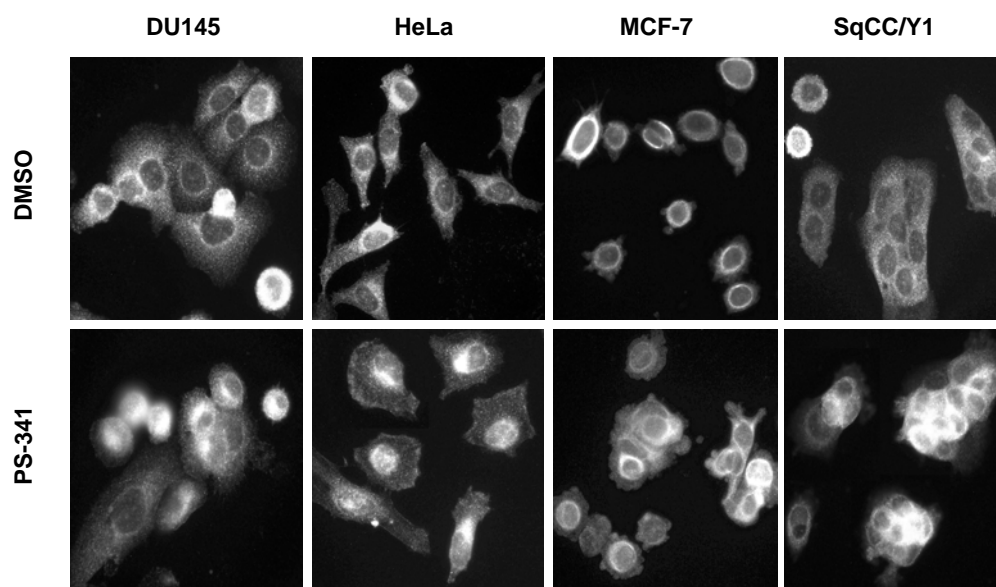

**Fig. S4. PS-341 induces p65 nuclear translocation in human cancer cell lines.** The given cell lines were treated with DMSO or 50 nM PS-341 for 4 h and then subjected to immunofluorescent staining of p65.
